# Supplementary material
Source: publisher figshare collection journal article supplement (https://acs.figshare.com/ndownloader/files/20811189)
Supplement: Supplementary file 1 [file 20811189]

## **Electronic Supplementary Information**

### **Determination of the Aggregate Binding Site of Amyloid Protofibrils Using Electron Capture Dissociation Tandem MS**

Yuko P. Y. Lam<sup>1</sup>, Christopher A. Wootton<sup>1</sup>, Ian Hands-Portman<sup>2</sup>, Juan Wei<sup>1</sup>, Cookson K. C. Chiu<sup>1</sup>, I.  
Romero-Canelon<sup>1,3</sup>, Frederik Lermyte<sup>1</sup>, Mark P. Barrow<sup>1</sup>, Peter B. O'Connor<sup>1\*</sup>

<sup>1</sup>Department of Chemistry, Gibbet Hill Road, University of Warwick, Coventry CV4 7AL, United  
Kingdom

<sup>2</sup>Department of Life Sciences, Gibbet Hill Campus, University of Warwick, Coventry CV4 7AL,  
United Kingdom

<sup>3</sup>School of Pharmacy, University of Birmingham, Edgbaston, Birmingham B15 2TT, United Kingdom

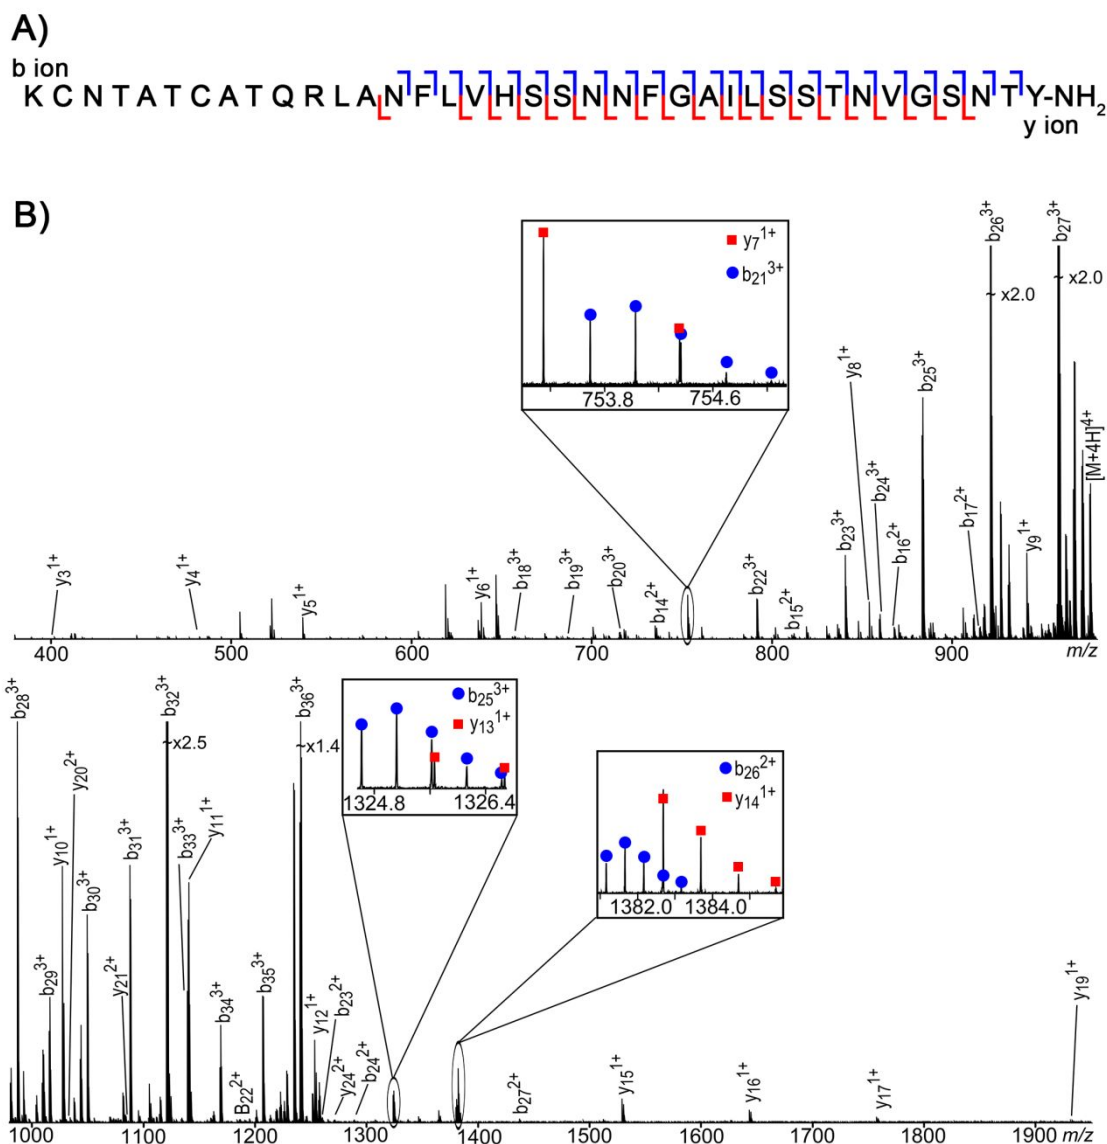

**Figure S1.** (A) Summarised b- and y-ion fragments observed in the (B) 18 V CAD mass spectrum of the 4+ charge state hIAPP monomer. The hIAPP sequence coverage from the CAD MS/MS was 65% and showed effective fragmentation and production of b and y ions from Asn-14 to Try-37; while no fragments were obtained from Lys-1 to Ala-13. Water and ammonia (NH<sub>3</sub>) loss from fragment were not labelled in the spectrum, but were common. The inserts show examples of isotopic distribution peaks, i.e. the b<sub>25</sub><sup>2+</sup> and y<sub>13</sub><sup>1+</sup> ions, which must be resolved with high resolution mass spectrometry in order to accurately assign fragment ions. The mass difference between the second

isotopic peak of  $y_7$  ion and the third isotopic peak of  $b_{21}$  ion was 0.0099 Da, and the resolving power at  $m/z$  753 was 240,000. The assigned fragments are listed in the Supporting Information Table S-1.

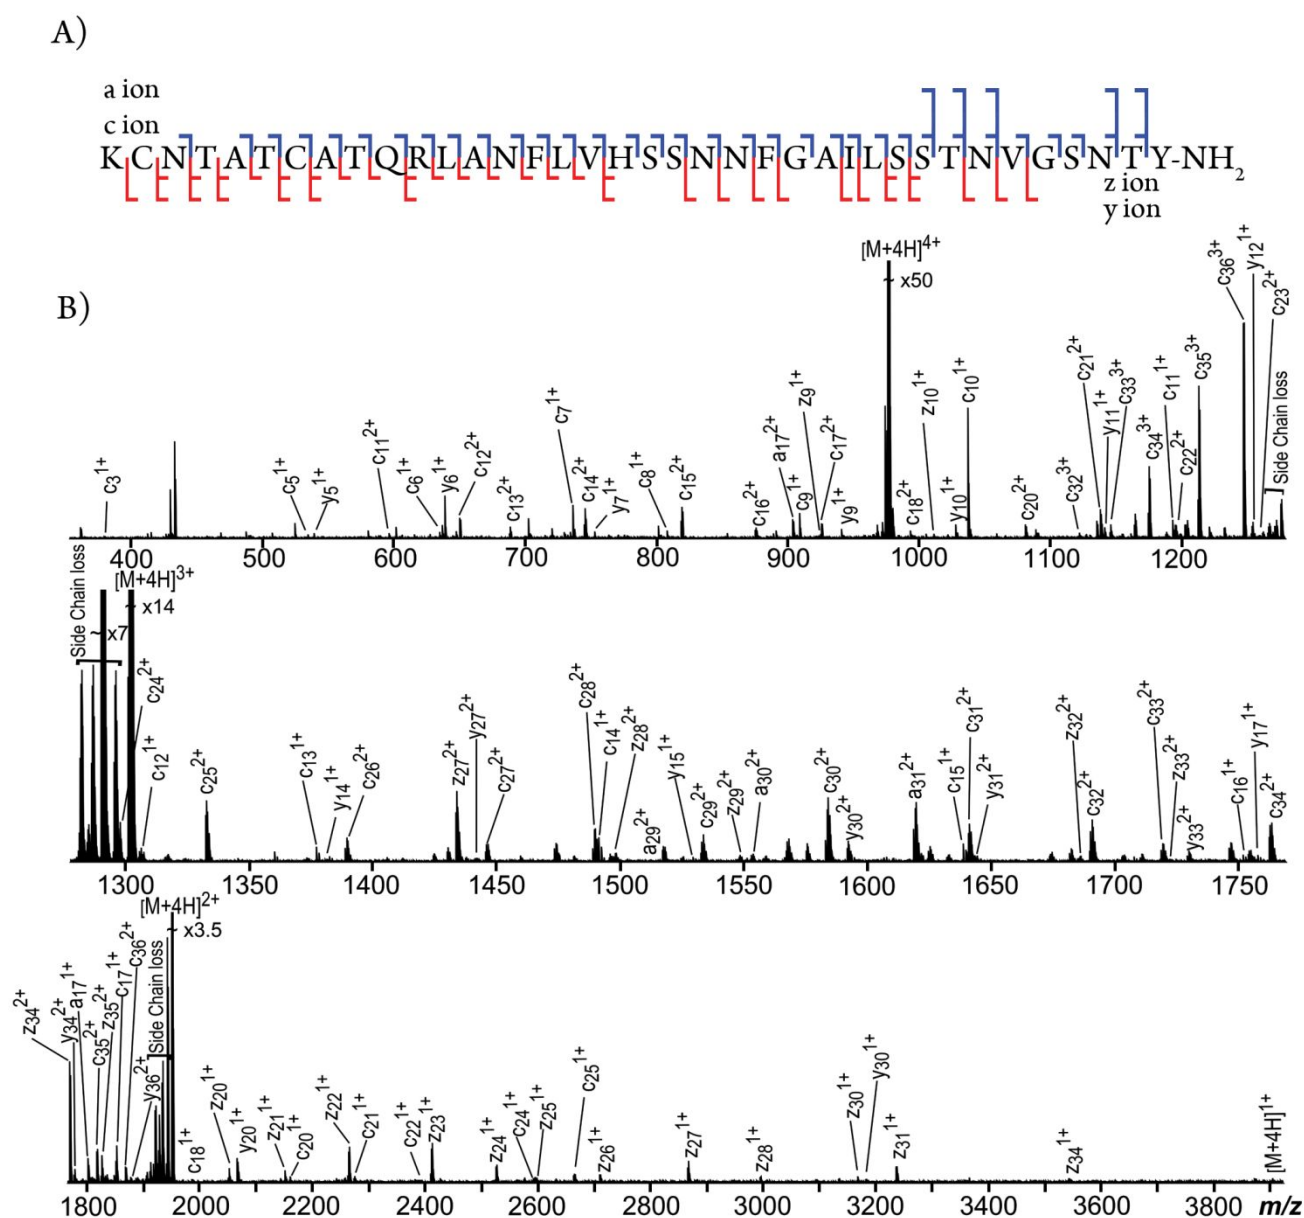

**Figure S2.** (A) Summarised a-, c-, y- and z-ion fragments observed in the (B) IR-ECD mass spectrum of the 4+ charge state hIAPP monomer. The hIAPP sequence coverage from the IR-ECD MS/MS was 100%. Amino acid side chain losses were not labelled in the spectrum, but were common. The assigned fragments are listed in the Supporting Information Table S-2.

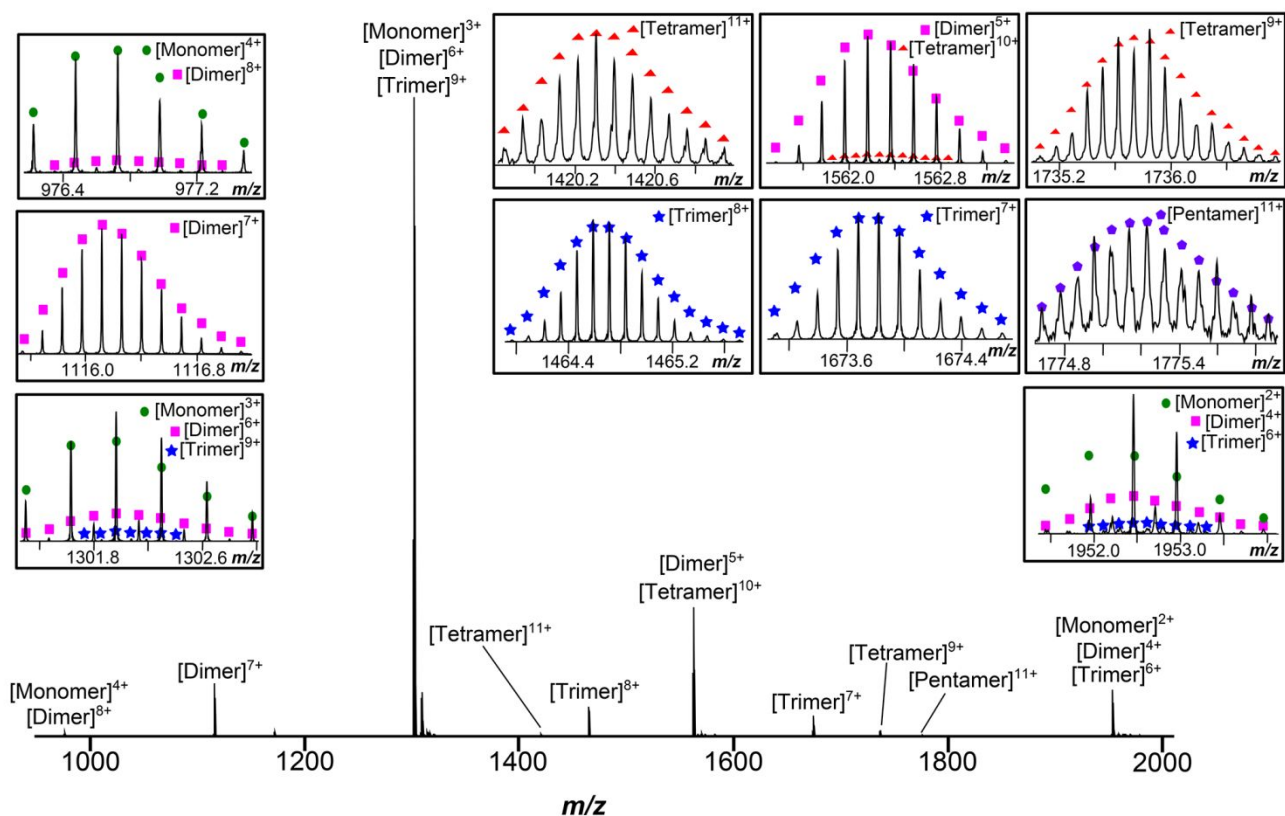

**Figure S3.** nESI mass spectrum of the early oligomers from 10  $\mu$ M hIAPP aqueous solution only.

hIAPP monomer (circle), dimer (square), trimer (star), tetramer (triangle), and pentamer (pentagon), were detected in the spectrum. The peak intensity decreased gradually with increasing oligomer size.

Inset, enlarge regions of spectra are shown for the labelled species. Coloured shapes represent theoretical calculated species overlaid onto observed pattern.

**A) ECD fragmentation map of the 5+ hIAPP dimer (with 2% DMSO)**

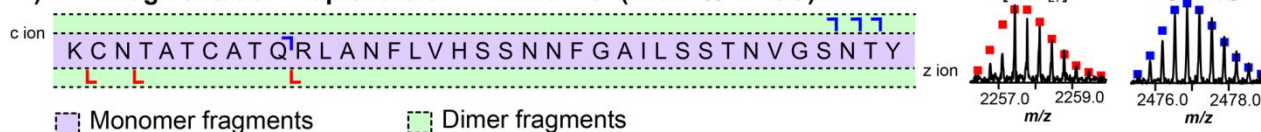

**B) ECD MS/MS spectrum of the 5+ hIAPP dimer (with 2% DMSO)**

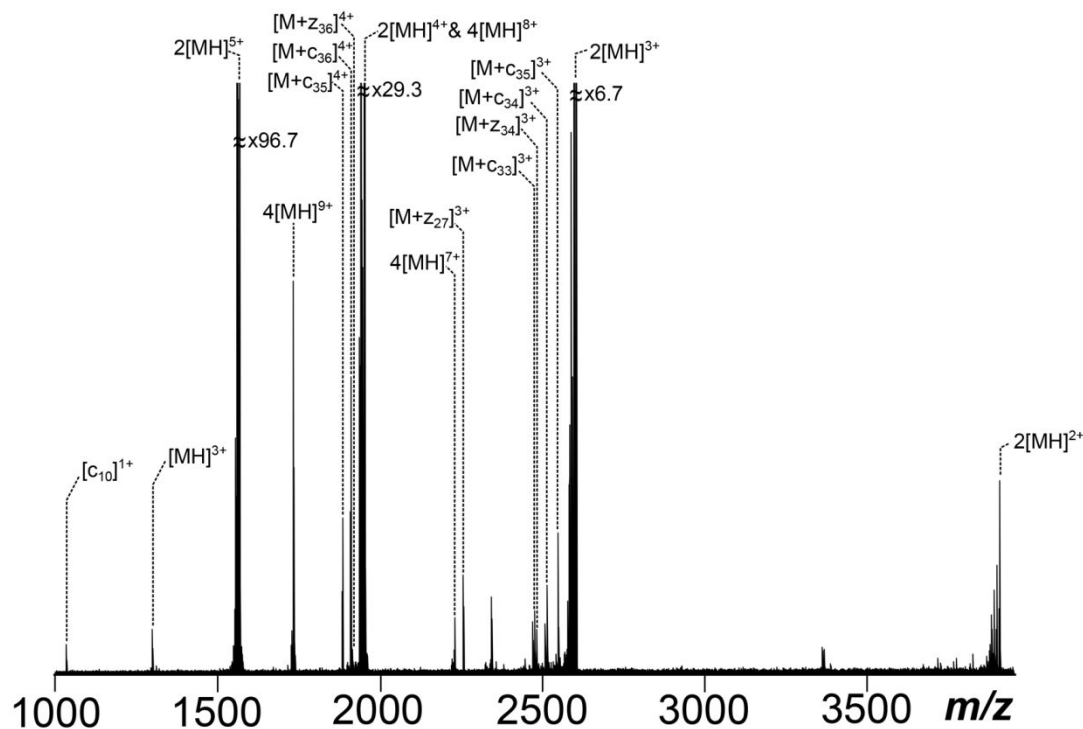

**Figure S4.** (A) Summarised c- and z-ion fragments observed in the (B) ECD mass spectrum of the 5+ charge state hIAPP dimer (in aqueous solution with 2% residual DMSO). The amino acid side chain losses were not labelled in the spectrum but were common. The isotopic distribution of the 10+ charge state hIAPP tetramer was present and overlapped with the 5+ charge state hIAPP dimer during isolation, and higher order oligomers, i.e. tetramer, are observed in the dimer ECD spectrum. The assigned fragments are listed in the Supporting Information Table S-3.

### A) IR-ECD fragmentation map of the 5+ hIAPP dimer (with 2% DMSO)

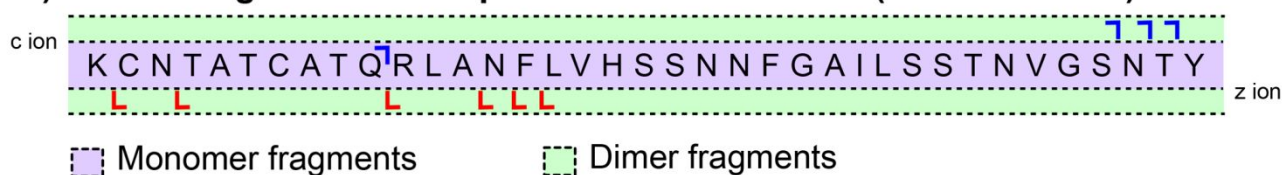

### The key IR-ECD fragments from the 5+ hIAPP dimer with various IR pulse lengths

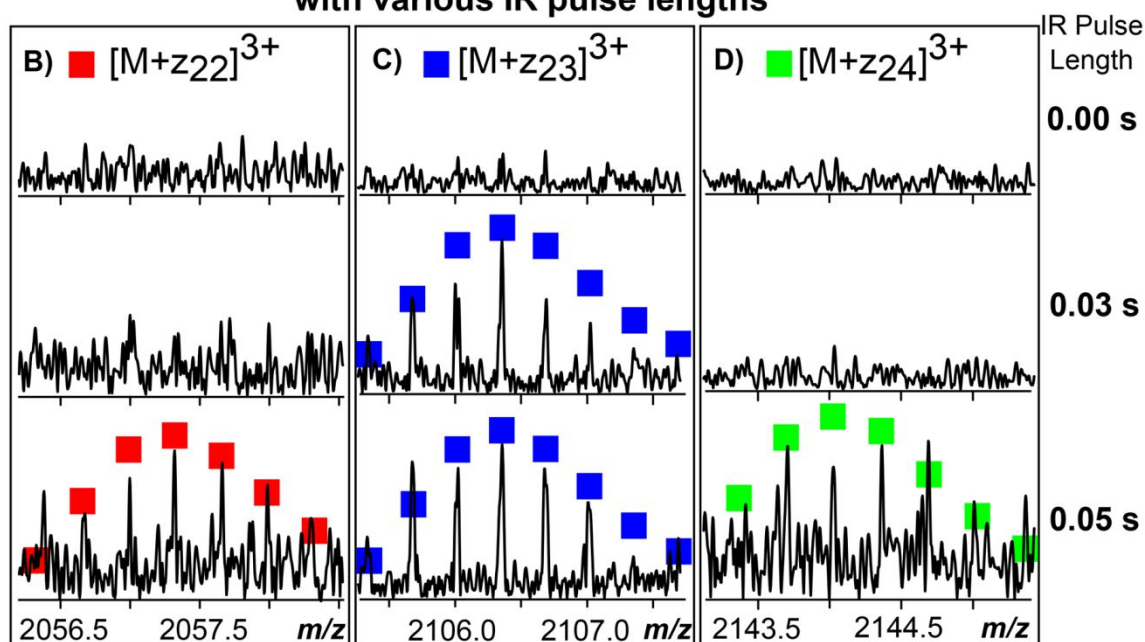

**Figure S5.** (A) Summarised c- and z-ion fragments observed in the IR-ECD MS/MS of the 5+ dimer hIAPP. Key IR-ECD fragments of (B)  $[M+z_{22}]^{3+}$  (red), (C)  $[M+z_{23}]^{3+}$  (blue), and (D)  $[M+z_{24}]^{3+}$  (green) from the 5+ charge state hIAPP dimer with various IR pulse lengths. When no IR laser was applied, no dimer fragments from  $M+z_{22}$  to  $M+z_{24}$  were observed. When IR pulse length was set to 0.03 s, an extra dimer fragment,  $M+z_{23}$ , was shown (B). Dimer fragments from  $M+z_{22}$  to  $M+z_{24}$  were identified from the spectrum while IR pulse length was increased to 0.05 s ((B) and (D) respectively). Coloured squares indicate simulated isotopic distributions in spectra where the fragment was detected and assigned.







**A) ECD fragmentation map of the 8+ hIAPP trimer (with 2% DMSO)**

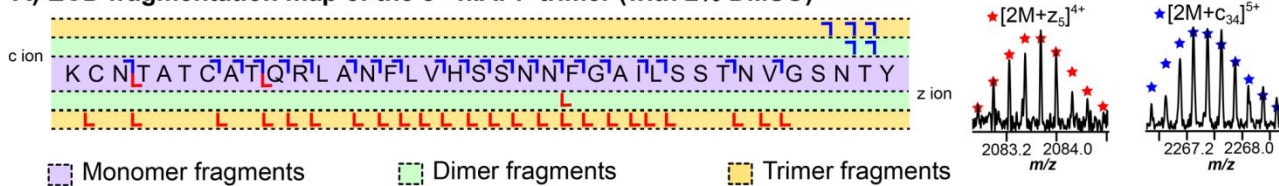

**B) ECD MS/MS spectrum of the 8+ hIAPP trimer (with 2% DMSO)**

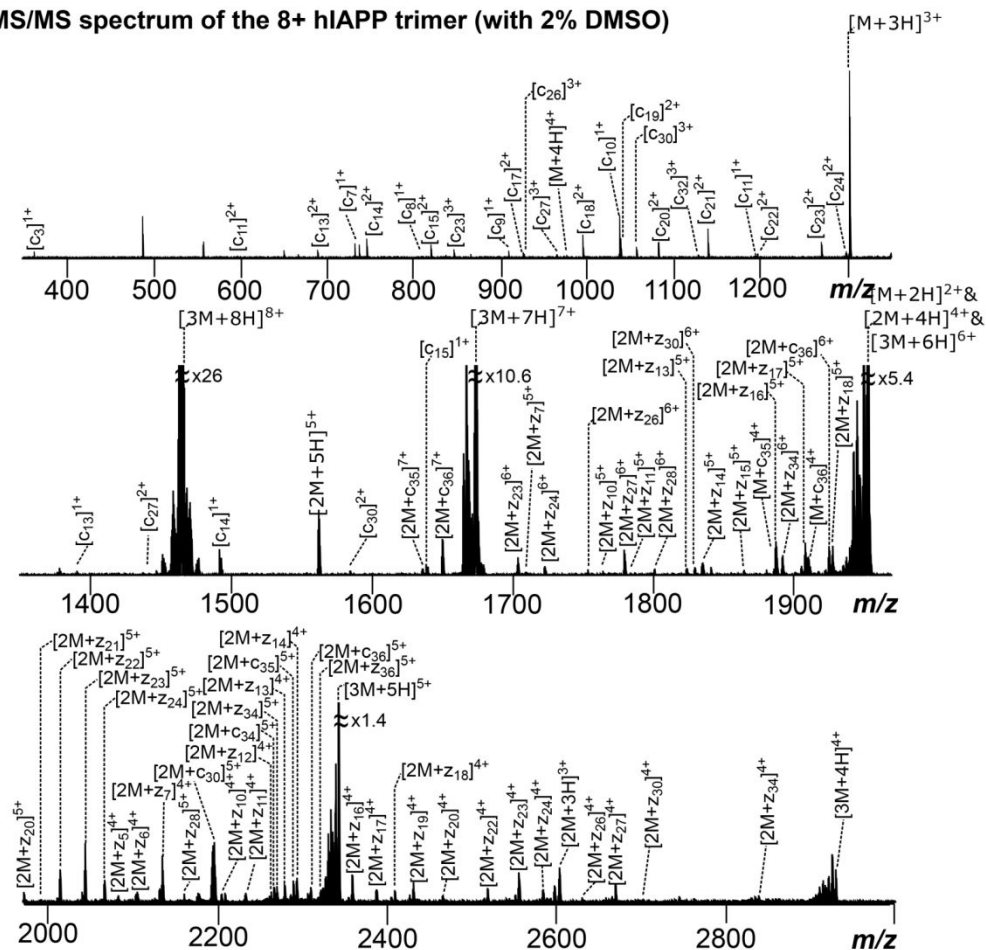

**Figure S7.** (A) Summary of c- and z-ion fragments observed in the (B) ECD mass spectrum of the 8+ charge state hIAPP trimer (in aqueous solution with 2% residual DMSO). The side chain losses were not labelled for clarity. The assigned fragments are listed in the Supporting Information Table S-5.

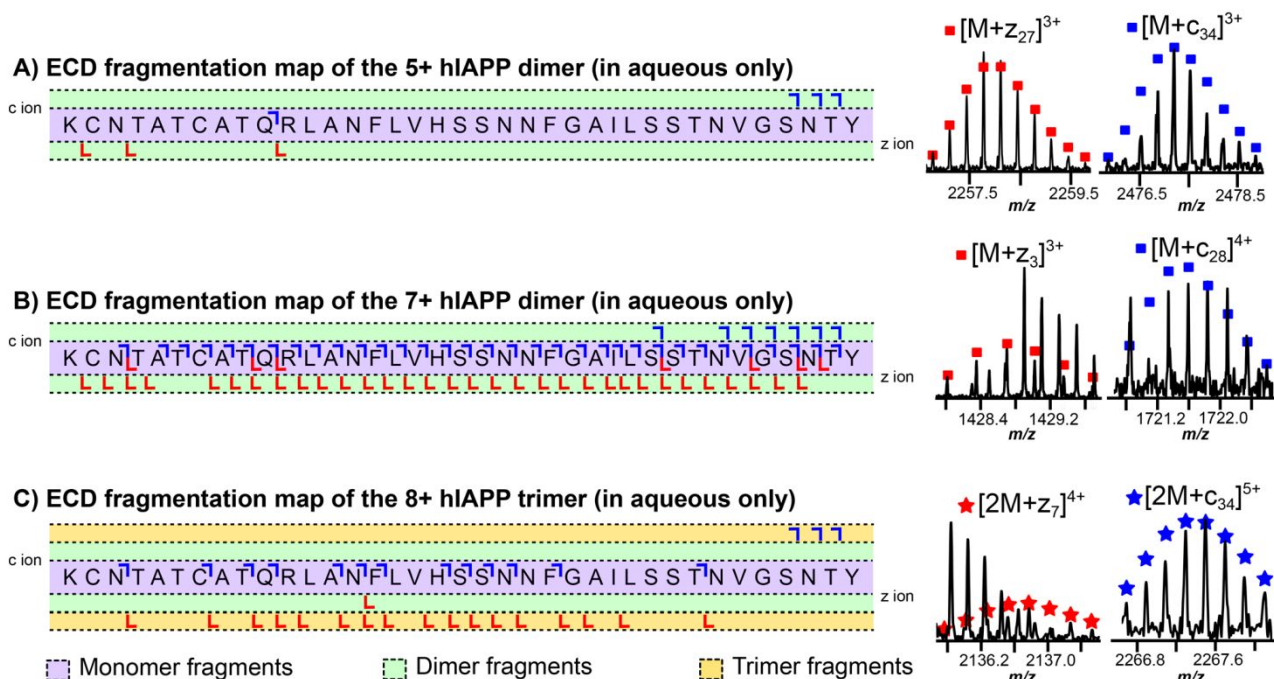

**Figure S8.** Summarised fragments observed in the ECD mass spectrum of the (A) 5+ charge state dimer, (B) 7+ charge state dimer, and (C) 8+ charge state trimer of hIAPP, in aqueous solution. Examples of the smallest assigned dimer c-and z-ions from the ECD MS/MS of the 5+ and the 7+ charge state dimers are inserted, respectively. Examples of the most critical trimer c- and z-ion from the ECD MS/MS of the 8+ charge state trimer are also inserted. Coloured shapes represent theoretical calculated species overlaid onto observed pattern. The assigned fragments are listed in the Supporting Information Tables S-6, S-7, and S-8.

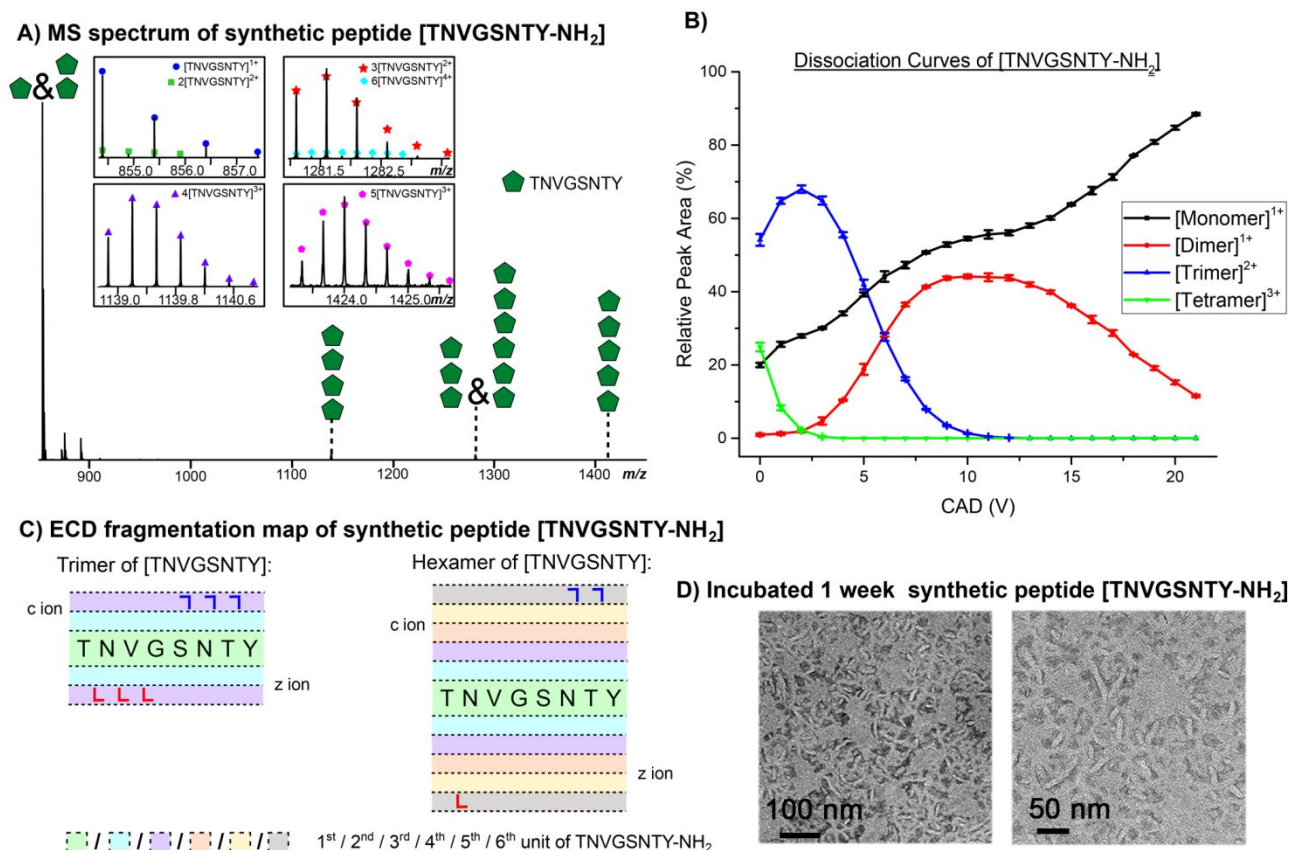

**Figure S9.** (A) Mass spectrum of the early oligomers of an eight-residue segment of hIAPP (<sup>30</sup>TNVGSNTY<sup>37</sup>-NH<sub>2</sub>) in aqueous solution. (B) The relative peak areas of monomer (black), dimer (red), trimer (blue), and tetramer (green) during the dissociation of the 3+ charge state tetramer of the eight-residue segment of hIAPP in the CAD MS/MS. (C) Summary of the ECD MS/MS fragments of the 2+ charge state hIAPP segment in aqueous solution. (D) TEM images The TEM images of the 1-week 10  $\mu$ M hIAPP segment solution. The scale bars for each TEM image are inset.

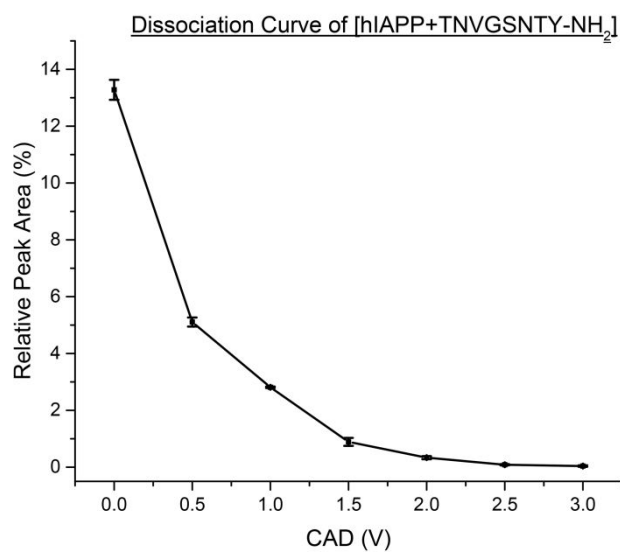

**Figure S10.** (A) The CAD curve of the 4+ charge state hIAPP and <sup>30</sup>TNVGSNTY<sup>37</sup>-NH<sub>2</sub> in 1:1 at *m/z* 1190. Only 13% of the mixture was successfully isolated and detected by the MS when no CAD energy was applied, which indicated the interaction between the biomolecules was very weak. The mixture was completely dissociated when 3 V of additional CAD energy was applied.

The table of assigned CAD MS/MS fragments of the 4+ hIAPP monomer

| Ion                    | Charge | Theoretical m/z | Experimental m/z | Error (ppm) |
|------------------------|--------|-----------------|------------------|-------------|
| MH                     | 4+     | 976.223168      | 976.223160       | 0.008       |
| b14                    | 2+     | 737.848058      | 737.848010       | 0.065       |
| b15                    | 2+     | 811.382265      | 811.382370       | -0.129      |
| b16                    | 2+     | 867.824297      | 867.824300       | -0.003      |
| b17                    | 2+     | 917.458504      | 917.458500       | 0.004       |
| b18                    | 2+     | 985.987960      | 985.988030       | -0.071      |
| b18                    | 3+     | 657.661065      | 657.661150       | -0.129      |
| b19                    | 3+     | 686.671741      | 686.671520       | 0.322       |
| b20                    | 3+     | 715.682418      | 715.682430       | -0.017      |
| b21                    | 3+     | 753.696727      | 753.696740       | -0.017      |
| b22                    | 2+     | 1187.062917     | 1187.063020      | -0.087      |
| b22                    | 3+     | 791.711036      | 791.711020       | 0.020       |
| b23                    | 2+     | 1260.597124     | 1260.597440      | -0.251      |
| b23                    | 3+     | 840.733841      | 840.733860       | -0.023      |
| b24                    | 2+     | 1289.107856     | 1289.107970      | -0.088      |
| b24                    | 3+     | 859.740996      | 859.740930       | 0.077       |
| b25                    | 2+     | 1324.626413     | 1324.626300      | 0.085       |
| b25                    | 3+     | 883.420034      | 883.420040       | -0.007      |
| b26                    | 2+     | 1381.168445     | 1381.168610      | -0.119      |
| b26                    | 3+     | 921.114722      | 921.114690       | 0.035       |
| b27                    | 2+     | 1437.710477     | 1437.710670      | -0.134      |
| b27                    | 3+     | 958.809410      | 958.809420       | -0.010      |
| b28                    | 3+     | 987.820086      | 987.820110       | -0.024      |
| b29                    | 3+     | 1016.830762     | 1016.830790      | -0.028      |
| b30                    | 3+     | 1050.513322     | 1050.513220      | 0.097       |
| b31                    | 3+     | 1088.527631     | 1088.527500      | 0.120       |
| b32                    | 3+     | 1121.550436     | 1121.550350      | 0.077       |
| b33                    | 3+     | 1140.557591     | 1140.557563      | 0.025       |
| b34                    | 3+     | 1169.568267     | 1169.568320      | -0.045      |
| b35                    | 3+     | 1207.582576     | 1207.582550      | 0.022       |
| b36                    | 3+     | 1241.265136     | 1241.265380      | -0.197      |
| y3                     | 1+     | 396.187761      | 396.187760       | 0.003       |
| y4                     | 1+     | 483.219790      | 483.219820       | -0.062      |
| y5                     | 1+     | 540.241254      | 540.241230       | 0.044       |
| y6                     | 1+     | 639.309668      | 639.309610       | 0.091       |
| y7                     | 1+     | 753.352596      | 753.352530       | 0.088       |
| y8                     | 1+     | 854.400275      | 854.400260       | 0.018       |
| y9                     | 1+     | 941.432304      | 941.432240       | 0.068       |
| y10                    | 1+     | 1028.464333     | 1028.464310      | 0.022       |
| y11                    | 1+     | 1141.548397     | 1141.548340      | 0.050       |
| y12                    | 1+     | 1254.632461     | 1254.632790      | -0.262      |
| y13                    | 1+     | 1325.669575     | 1325.669660      | -0.064      |
| y14                    | 1+     | 1382.691039     | 1382.690920      | 0.086       |
| y15                    | 1+     | 1529.759453     | 1529.759470      | -0.011      |
| y16                    | 1+     | 1643.802381     | 1643.802440      | -0.036      |
| y17                    | 1+     | 1757.845309     | 1757.844940      | 0.210       |
| y19                    | 1+     | 1931.909367     | 1931.908680      | 0.356       |
| y20                    | 2+     | 1034.987778     | 1034.987630      | 0.143       |
| y21                    | 2+     | 1084.521985     | 1084.521550      | 0.401       |
| y24                    | 2+     | 1271.619688     | 1271.619710      | -0.017      |
| Average Error:         |        |                 |                  | 0.014       |
| Absolute Average Error |        |                 |                  | 0.087       |
| Standard Deviation:    |        |                 |                  | 0.128       |

**Table S1.** List of the assigned CAD MS/MS fragments of the 4+ charge state hIAPP monomer.

The table of assigned IR-ECD MS/MS fragments of the 4+ hIAPP monomer

| Ion | Charge | Theoretical $m/z$ | Experimental $m/z$ | Error (ppm) |
|-----|--------|-------------------|--------------------|-------------|
| MI  | 2+     | 1951.43911        | 1951.43866         | 0.231       |
| MI  | 3+     | 1301.29518        | 1301.29502         | 0.123       |
| MI  | 4+     | 976.22322         | 976.22328          | -0.065      |
| a17 | 1+     | 1807.93112        | 1807.93134         | -0.120      |
| a17 | 2+     | 903.96531         | 903.96539          | -0.087      |
| a29 | 2+     | 1511.75323        | 1511.75176         | 0.970       |
| a30 | 2+     | 1561.77315        | 1561.77194         | 0.777       |
| a31 | 2+     | 1618.79462        | 1618.79380         | 0.505       |
| a35 | 3+     | 1198.58713        | 1198.58681         | 0.269       |
| a36 | 3+     | 1232.26969        | 1232.26908         | 0.496       |
| c3  | 1+     | 362.17313         | 362.17312          | 0.014       |
| c5  | 1+     | 535.26574         | 535.26570          | 0.080       |
| c6  | 1+     | 635.30568         | 635.30560          | 0.131       |
| c7  | 1+     | 737.30696         | 737.30696          | -0.004      |
| c8  | 1+     | 808.34407         | 808.34406          | 0.014       |
| c9  | 1+     | 909.39175         | 909.39152          | 0.253       |
| c10 | 1+     | 1037.45033        | 1037.45041         | -0.079      |
| c11 | 1+     | 1193.55144        | 1193.55160         | -0.135      |
| c11 | 2+     | 597.27938         | 597.27939          | -0.013      |
| c12 | 1+     | 1306.63550        | 1306.63612         | -0.472      |
| c12 | 2+     | 653.82141         | 653.82139          | 0.037       |
| c13 | 1+     | 1377.67262        | 1377.67320         | -0.423      |
| c13 | 2+     | 688.83606         | 688.83613          | -0.104      |
| c14 | 1+     | 1491.71555        | 1491.71590         | -0.238      |
| c14 | 2+     | 745.85752         | 745.85764          | -0.158      |
| c15 | 1+     | 1638.78396        | 1638.78399         | -0.019      |
| c15 | 2+     | 819.39173         | 819.39174          | -0.013      |
| c16 | 1+     | 1751.86802        | 1751.86790         | 0.070       |
| c16 | 2+     | 875.93376         | 875.93381          | -0.055      |
| c17 | 1+     | 1850.93644        | 1850.93660         | -0.088      |
| c17 | 2+     | 925.46797         | 925.46763          | 0.366       |
| c18 | 1+     | 1987.99535        | 1987.99514         | 0.105       |
| c18 | 2+     | 993.99742         | 993.99771          | -0.287      |
| c19 | 1+     | 2075.02738        | 2075.02573         | 0.794       |
| c20 | 1+     | 2162.05941        | 2162.05959         | -0.085      |
| c20 | 2+     | 1081.02945        | 1081.02974         | -0.265      |
| c21 | 1+     | 2276.10234        | 2276.10147         | 0.380       |
| c21 | 2+     | 1138.05092        | 1138.05099         | -0.063      |
| c22 | 1+     | 2390.14526        | 2390.14589         | -0.262      |
| c22 | 2+     | 1195.07238        | 1195.07235         | 0.027       |
| c23 | 2+     | 1268.60659        | 1268.60608         | 0.401       |
| c24 | 1+     | 2594.23514        | 2594.23517         | -0.011      |
| c24 | 2+     | 1297.11732        | 1297.11750         | -0.138      |
| c25 | 1+     | 2665.27226        | 2665.27400         | -0.655      |
| c25 | 2+     | 1332.63588        | 1332.63575         | 0.096       |
| c26 | 2+     | 1389.17791        | 1389.17764         | 0.194       |
| c27 | 2+     | 1445.71994        | 1445.71981         | 0.091       |
| c28 | 2+     | 1489.23596        | 1489.23572         | 0.159       |
| c29 | 2+     | 1532.75197        | 1532.75136         | 0.399       |
| c30 | 2+     | 1583.27581        | 1583.27540         | 0.260       |
| c31 | 2+     | 1640.29728        | 1640.29653         | 0.454       |
| c32 | 2+     | 1689.83148        | 1689.83118         | 0.179       |
| c32 | 3+     | 1127.22604        | 1127.22587         | 0.148       |
| c33 | 2+     | 1718.84613        | 1718.84536         | 0.446       |
| c33 | 3+     | 1145.89725        | 1145.89698         | 0.236       |
| c34 | 2+     | 1762.36214        | 1762.36211         | 0.017       |

| Ion | Charge | Theoretical $m/z$ | Experimental $m/z$ | Error (ppm) |
|-----|--------|-------------------|--------------------|-------------|
| c34 | 3+     | 1174.90793        | 1174.90780         | 0.107       |
| c35 | 2+     | 1819.38360        | 1819.38333         | 0.151       |
| c35 | 3+     | 1212.92224        | 1212.92203         | 0.170       |
| c36 | 2+     | 1869.90744        | 1869.90769         | -0.132      |
| c36 | 3+     | 1246.94074        | 1246.94060         | 0.110       |
| y5  | 1+     | 540.24130         | 540.24125          | 0.098       |
| y6  | 1+     | 639.30972         | 639.30975          | -0.056      |
| y7  | 1+     | 753.35265         | 753.35263          | 0.020       |
| y9  | 1+     | 941.43235         | 941.43252          | -0.177      |
| y10 | 1+     | 1028.46438        | 1028.46443         | -0.047      |
| y11 | 1+     | 1141.54845        | 1141.54859         | -0.126      |
| y12 | 1+     | 1254.63251        | 1254.63226         | 0.199       |
| y14 | 1+     | 1382.69109        | 1382.69111         | -0.016      |
| y15 | 1+     | 1529.75950        | 1529.76034         | -0.548      |
| y17 | 1+     | 1757.84536        | 1757.84562         | -0.149      |
| y20 | 1+     | 2067.96050        | 2067.96070         | -0.095      |
| y27 | 2+     | 1441.73088        | 1441.73073         | 0.105       |
| y30 | 1+     | 3182.59781        | 3182.59677         | 0.326       |
| y30 | 2+     | 1591.80257        | 1591.80241         | 0.099       |
| y31 | 2+     | 1643.30716        | 1643.30816         | -0.609      |
| y33 | 2+     | 1729.34956        | 1729.34844         | 0.645       |
| y34 | 2+     | 1779.87340        | 1779.87317         | 0.127       |
| y35 | 2+     | 1836.89486        | 1836.89417         | 0.376       |
| y36 | 2+     | 1888.39945        | 1888.39807         | 0.732       |
| z9  | 1+     | 924.40580         | 924.40610          | -0.320      |
| z10 | 1+     | 1011.43783        | 1011.43803         | -0.195      |
| z20 | 1+     | 2053.95743        | 2053.95716         | 0.131       |
| z21 | 1+     | 2153.02584        | 2153.02496         | 0.410       |
| z22 | 1+     | 2266.10991        | 2266.10964         | 0.118       |
| z23 | 1+     | 2413.17832        | 2413.17751         | 0.336       |
| z24 | 1+     | 2527.22125        | 2527.22156         | -0.123      |
| z25 | 1+     | 2598.25836        | 2598.25951         | -0.441      |
| z26 | 1+     | 2711.34243        | 2711.34193         | 0.183       |
| z27 | 1+     | 2867.44354        | 2867.44323         | 0.107       |
| z27 | 2+     | 1433.72152        | 1433.72140         | 0.083       |
| z28 | 1+     | 2995.50212        | 2995.50392         | -0.602      |
| z28 | 2+     | 1497.75081        | 1497.75092         | -0.075      |
| z29 | 2+     | 1547.77074        | 1547.77091         | -0.112      |
| z30 | 1+     | 3167.58691        | 3167.58800         | -0.344      |
| z30 | 2+     | 1583.79321        | 1583.79456         | -0.856      |
| z31 | 1+     | 3236.60843        | 3236.60698         | 0.447       |
| z32 | 2+     | 1685.31772        | 1685.31730         | 0.252       |
| z33 | 2+     | 1721.84155        | 1721.84026         | 0.749       |
| z34 | 1+     | 3541.71292        | 3541.71563         | -0.766      |
| z34 | 2+     | 1770.85621        | 1770.85563         | 0.327       |
| z35 | 2+     | 1827.87767        | 1827.87733         | 0.188       |

Average Error: 0.056  
Absolute Average Error: 0.245  
Standard Deviation: 0.326

**Table S2.** List of the assigned IR-ECD MS/MS fragments of the 4+ charge state hIAPP monomer.

The table of assigned ECD MS/MS fragments of the 5+ hIAPP dimer  
(in aqueous solution with 2% DMSO)

| Ion                     | Charge | Theoretical $m/z$ | Experimental $m/z$ | Error (ppm) |
|-------------------------|--------|-------------------|--------------------|-------------|
| MI                      | 3+     | 1301.963507       | 1301.963571        | 0.049       |
| 2[MI]                   | 5+     | 1561.352698       | 1561.352462        | -0.151      |
| 2[MI]                   | 4+     | 1951.691010       | 1951.691642        | 0.324       |
| 2[MI]                   | 3+     | 2603.591637       | 2603.591864        | 0.087       |
| 2[MI]                   | 2+     | 3905.889909       | 3905.887841        | -0.529      |
| 4[MI]                   | 9+     | 1735.727472       | 1735.727310        | -0.093      |
| 4[MI]                   | 7+     | 2231.936089       | 2231.935654        | -0.195      |
| c10                     | 1+     | 1037.450279       | 1037.450296        | 0.016       |
| M+c33                   | 3+     | 2477.204351       | 2477.203234        | -0.451      |
| M+c34                   | 3+     | 2515.218663       | 2515.218503        | -0.064      |
| M+c35                   | 4+     | 1886.413782       | 1886.414164        | 0.203       |
| M+c35                   | 3+     | 2549.237172       | 2549.237617        | 0.175       |
| M+c36                   | 4+     | 1911.675709       | 1911.675955        | 0.129       |
| M+z27                   | 3+     | 2257.776545       | 2257.776772        | 0.101       |
| M+z34                   | 3+     | 2482.868916       | 2482.869352        | 0.176       |
| M+z36                   | 4+     | 1916.414523       | 1916.414374        | -0.078      |
| Average Error:          |        |                   |                    | -0.019      |
| Absolute Average Error: |        |                   |                    | 0.176       |
| Standard Deviation:     |        |                   |                    | 0.231       |

**Table S3.** List of the assigned ECD MS/MS fragments of the 5+ hIAPP dimer ion (in aqueous solution with 2% residual DMSO). M represents one hIAPP unit.



# The table of assigned ECD MS/MS fragments of the 7+ hIAPP dimer

| Ion   | Charge | Theoretical | Experimental | Error (ppm) | Ion                     | Charge | Theoretical | Experimental | Error (ppm) |
|-------|--------|-------------|--------------|-------------|-------------------------|--------|-------------|--------------|-------------|
| MI    | 4+     | 976.223165  | 976.223805   | 0.656       | M+c32                   | 5+     | 1457.511616 | 1457.510861  | -0.518      |
| MI    | 3+     | 1301.295128 | 1301.295174  | 0.035       | M+c32                   | 4+     | 1822.140215 | 1822.139354  | -0.473      |
| MI    | 2+     | 1952.444365 | 1952.444262  | -0.053      | M+c33                   | 5+     | 1469.519461 | 1469.519063  | -0.271      |
| 2[MI] | 7+     | 1116.112577 | 1116.111471  | -0.991      | M+c34                   | 5+     | 1486.323445 | 1486.323359  | -0.058      |
| 2[MI] | 6+     | 1301.462261 | 1301.462328  | 0.051       | M+c35                   | 5+     | 1509.332474 | 1509.331626  | -0.562      |
| 2[MI] | 5+     | 1561.956388 | 1561.956346  | -0.027      | M+c35                   | 4+     | 1886.665738 | 1886.665069  | -0.355      |
| 2[MI] | 4+     | 1953.196034 | 1953.195933  | -0.052      | M+c36                   | 5+     | 1529.942864 | 1529.942434  | -0.281      |
| c3    | 1+     | 362.173076  | 362.173094   | 0.050       | M+z3                    | 3+     | 1428.350791 | 1428.350757  | -0.024      |
| c5    | 1+     | 534.257869  | 534.258045   | 0.329       | M+z5                    | 3+     | 1476.704568 | 1476.704885  | 0.215       |
| c6    | 1+     | 635.305548  | 635.305514   | -0.054      | M+z6                    | 3+     | 1509.058958 | 1509.059320  | 0.240       |
| c7    | 1+     | 737.306908  | 737.307100   | 0.260       | M+z7                    | 3+     | 1547.741690 | 1547.741830  | 0.090       |
| c8    | 1+     | 808.344022  | 808.344287   | 0.328       | M+z7                    | 2+     | 2320.607666 | 2320.607643  | -0.010      |
| c9    | 1+     | 909.391701  | 909.391934   | 0.256       | M+z8                    | 3+     | 1581.088313 | 1581.089390  | 0.681       |
| c10   | 1+     | 1037.450279 | 1037.450719  | 0.424       | M+z9                    | 3+     | 1610.769064 | 1610.769547  | 0.300       |
| c11   | 2+     | 597.279333  | 597.279334   | 0.002       | M+z9                    | 2+     | 2459.168869 | 2459.170923  | 0.835       |
| c11   | 1+     | 1193.551390 | 1193.551623  | 0.195       | M+z10                   | 4+     | 1229.584072 | 1229.584641  | 0.463       |
| c12   | 2+     | 653.821365  | 653.821234   | -0.201      | M+z10                   | 3+     | 1639.445612 | 1639.445934  | 0.196       |
| c13   | 2+     | 689.339922  | 689.340001   | 0.115       | M+z11                   | 3+     | 1676.471867 | 1676.471173  | -0.414      |
| c13   | 1+     | 1378.675984 | 1378.675689  | -0.214      | M+z11                   | 2+     | 2515.206996 | 2515.206528  | -0.186      |
| c14   | 2+     | 746.361386  | 746.361455   | 0.092       | M+z12                   | 3+     | 1714.835007 | 1714.834497  | -0.297      |
| c15   | 2+     | 819.895593  | 819.895640   | 0.057       | M+z13                   | 3+     | 1738.514047 | 1738.514068  | 0.012       |
| c16   | 2+     | 876.437625  | 876.437762   | 0.156       | M+z13                   | 2+     | 2607.771504 | 2607.772357  | 0.327       |
| c17   | 2+     | 925.971832  | 925.971982   | 0.162       | M+z14                   | 4+     | 1317.890129 | 1317.890715  | 0.445       |
| c18   | 2+     | 994.501527  | 994.501605   | 0.078       | M+z14                   | 3+     | 1757.521201 | 1757.520755  | -0.254      |
| c19   | 2+     | 1038.017303 | 1038.017169  | -0.129      | M+z14                   | 2+     | 2635.780806 | 2635.780280  | -0.200      |
| c20   | 2+     | 1081.533317 | 1081.533376  | 0.055       | M+z15                   | 4+     | 1355.158480 | 1355.158464  | -0.012      |
| c21   | 3+     | 759.706520  | 759.706974   | 0.598       | M+z15                   | 3+     | 1807.212338 | 1807.212131  | -0.115      |
| c21   | 2+     | 1139.056142 | 1139.056500  | 0.314       | M+z16                   | 4+     | 1382.917263 | 1382.917504  | 0.174       |
| c22   | 3+     | 797.386589  | 797.386802   | 0.267       | M+z16                   | 3+     | 1844.892492 | 1844.892443  | -0.027      |
| c22   | 2+     | 1196.077601 | 1196.077549  | -0.043      | M+z16                   | 2+     | 2767.339383 | 2767.339020  | -0.131      |
| c23   | 3+     | 846.409393  | 846.409492   | 0.117       | M+z17                   | 4+     | 1412.430522 | 1412.430040  | -0.341      |
| c23   | 2+     | 1269.110452 | 1269.110945  | 0.388       | M+z17                   | 3+     | 1882.906802 | 1882.906777  | -0.013      |
| c24   | 3+     | 865.416548  | 865.416691   | 0.165       | M+z18                   | 4+     | 1433.436703 | 1433.436422  | -0.196      |
| c25   | 3+     | 889.429834  | 889.430058   | 0.252       | M+z18                   | 3+     | 1912.251644 | 1912.251179  | -0.243      |
| c25   | 2+     | 1333.139741 | 1333.139860  | 0.089       | M+z19                   | 4+     | 1455.695966 | 1455.695701  | -0.182      |
| c26   | 3+     | 926.790272  | 926.790897   | 0.674       | M+z19                   | 3+     | 1941.264102 | 1941.263992  | -0.057      |
| c26   | 2+     | 1390.183152 | 1390.183739  | 0.422       | M+z20                   | 4+     | 1489.960695 | 1489.960191  | -0.338      |
| c27   | 3+     | 964.484962  | 964.484859   | -0.107      | M+z20                   | 3+     | 1985.946098 | 1985.945390  | -0.357      |
| c27   | 2+     | 1447.226592 | 1447.226424  | -0.116      | M+z21                   | 4+     | 1514.727806 | 1514.727036  | -0.508      |
| c28   | 3+     | 993.828986  | 993.830644   | 0.753       | M+z21                   | 3+     | 2019.971451 | 2019.971805  | 0.175       |
| c28   | 2+     | 1490.241206 | 1490.241252  | 0.031       | M+z22                   | 4+     | 1543.000167 | 1542.999155  | -0.656      |
| c29   | 3+     | 1022.840573 | 1022.840462  | -0.109      | M+z22                   | 3+     | 2058.000340 | 2058.000870  | 0.258       |
| c29   | 2+     | 1533.757222 | 1533.758500  | 0.833       | M+z23                   | 5+     | 1264.014214 | 1264.014352  | 0.109       |
| c30   | 3+     | 1056.188874 | 1056.189084  | 0.199       | M+z23                   | 4+     | 1579.013956 | 1579.014330  | 0.237       |
| c30   | 2+     | 1584.281062 | 1584.280913  | -0.094      | M+z23                   | 3+     | 2106.354800 | 2106.354957  | 0.075       |
| c31   | 3+     | 1094.203184 | 1094.203179  | -0.005      | M+z24                   | 4+     | 1607.776644 | 1607.776314  | -0.205      |
| c31   | 2+     | 1641.302522 | 1641.302019  | -0.306      | M+z24                   | 3+     | 2144.034920 | 2144.034484  | -0.203      |
| c32   | 3+     | 1127.225988 | 1127.225763  | -0.200      | M+z25                   | 4+     | 1626.287918 | 1626.287893  | -0.015      |
| c32   | 2+     | 1691.338138 | 1691.338733  | 0.352       | M+z25                   | 3+     | 2168.382333 | 2168.383232  | 0.415       |
| c33   | 3+     | 1146.567401 | 1146.567371  | -0.026      | M+z26                   | 5+     | 1323.246008 | 1323.245622  | -0.292      |
| c33   | 2+     | 1720.350316 | 1720.350904  | 0.342       | M+z26                   | 4+     | 1654.308308 | 1654.307969  | -0.205      |
| c34   | 3+     | 1176.246205 | 1176.246590  | 0.327       | M+z26                   | 3+     | 2206.411232 | 2206.412492  | 0.571       |
| c34   | 2+     | 1762.362086 | 1762.362122  | 0.020       | M+z27                   | 5+     | 1354.466227 | 1354.466407  | 0.133       |
| c35   | 3+     | 1213.258129 | 1213.258089  | -0.033      | M+z27                   | 4+     | 1693.584213 | 1693.584379  | 0.098       |
| c35   | 2+     | 1820.386340 | 1820.386545  | 0.113       | M+z27                   | 3+     | 2258.112487 | 2258.114584  | 0.929       |
| c36   | 3+     | 1247.274945 | 1247.275773  | 0.664       | M+z28                   | 5+     | 1380.679464 | 1380.678457  | -0.729      |
| c36   | 2+     | 1870.408779 | 1870.409286  | 0.271       | M+z28                   | 4+     | 1725.598859 | 1725.599307  | 0.260       |
| y2    | 1+     | 282.144833  | 282.144822   | -0.039      | M+z29                   | 5+     | 1401.089476 | 1401.088932  | -0.388      |
| y3    | 1+     | 396.187761  | 396.187745   | -0.040      | M+z30                   | 5+     | 1415.296902 | 1415.296093  | -0.572      |
| y4    | 1+     | 483.219829  | 483.219862   | 0.068       | M+z30                   | 4+     | 1768.870673 | 1768.870285  | -0.219      |
| y6    | 1+     | 639.309668  | 639.309557   | -0.174      | M+z34                   | 5+     | 1490.724486 | 1490.724988  | 0.337       |
| y7    | 1+     | 753.352596  | 753.352769   | 0.230       | M+z34                   | 4+     | 1862.904657 | 1862.904749  | 0.049       |
| y8    | 1+     | 854.400275  | 854.400522   | 0.289       | M+z35                   | 5+     | 1513.332634 | 1513.332401  | -0.154      |
| y30   | 2+     | 1592.303929 | 1592.304003  | 0.046       | M+z35                   | 4+     | 1891.665973 | 1891.665087  | -0.468      |
| z2    | 1+     | 266.126109  | 266.126109   | 0.000       | M+z36                   | 5+     | 1533.733951 | 1533.734428  | 0.311       |
| z5    | 1+     | 525.230353  | 525.230345   | -0.015      | M+z36                   | 4+     | 1916.915649 | 1916.915513  | -0.071      |
| z28   | 2+     | 1498.756089 | 1498.757430  | 0.895       | Average Error:          |        |             |              | 0.052       |
| z34   | 2+     | 1771.861482 | 1771.862629  | 0.647       | Absolute Average Error: |        |             |              | 0.257       |
| M+c29 | 5+     | 1394.680928 | 1394.680459  | -0.336      | Standard Deviation:     |        |             |              | 0.337       |
| M+c31 | 5+     | 1438.300318 | 1438.300930  | 0.426       |                         |        |             |              |             |

**Table S4.** List of the assigned fragments from the ECD mass spectrum of the 7+ charge state hIAPP dimer. M represents one hIAPP unit.

The table of assigned ECD MS/MS fragments of the 8+ hIAPP trimer  
(in aqueous solution with 2% DMSO)

| Ion    | Charge | Theoretical m/z | Experimental m/z | Error (ppm) |
|--------|--------|-----------------|------------------|-------------|
| MI     | 4+     | 976.473865      | 976.473629       | -0.242      |
| MI     | 3+     | 1301.295128     | 1301.295286      | 0.121       |
| [MI]   | 2+     | 1951.940453     | 1951.941145      | 0.355       |
| 2[MI]  | 5+     | 1562.356263     | 1562.357084      | 0.525       |
| 2[MI]  | 4+     | 1952.693510     | 1952.694205      | 0.356       |
| 2[MI]  | 3+     | 2603.925582     | 2603.925690      | 0.041       |
| 3[MI]  | 8+     | 1464.081791     | 1464.080743      | -0.716      |
| 3[MI]  | 7+     | 1673.809188     | 1673.808501      | -0.410      |
| 3[MI]  | 6+     | 1952.944506     | 1952.944143      | -0.186      |
| 3[MI]  | 5+     | 2343.733943     | 2343.733157      | -0.335      |
| 3[MI]  | 4+     | 2929.417034     | 2929.416922      | -0.038      |
| c3     | 1+     | 362.173076      | 362.173076       | 0.000       |
| c7     | 1+     | 737.306908      | 737.306719       | -0.256      |
| c8     | 1+     | 808.344022      | 808.344125       | 0.127       |
| c9     | 1+     | 909.391701      | 909.391441       | -0.286      |
| c10    | 1+     | 1037.450279     | 1037.450094      | -0.178      |
| c11    | 2+     | 597.279333      | 597.279295       | -0.064      |
| c11    | 1+     | 1193.551390     | 1193.551988      | 0.501       |
| c13    | 2+     | 689.339922      | 689.339629       | -0.425      |
| c13    | 1+     | 1377.672568     | 1377.673088      | 0.377       |
| c14    | 2+     | 746.361386      | 746.361097       | -0.387      |
| c14    | 1+     | 1491.715496     | 1491.715765      | 0.180       |
| c15    | 2+     | 819.895593      | 819.895366       | -0.277      |
| c15    | 1+     | 1638.783910     | 1638.784035      | 0.076       |
| c17    | 2+     | 925.971832      | 925.971525       | -0.332      |
| c18    | 2+     | 994.501288      | 994.501262       | -0.026      |
| c19    | 2+     | 1038.017303     | 1038.016936      | -0.354      |
| c20    | 2+     | 1081.533317     | 1081.533089      | -0.211      |
| c21    | 2+     | 1138.554781     | 1138.554661      | -0.105      |
| c22    | 2+     | 1195.576245     | 1195.576197      | -0.040      |
| c23    | 3+     | 846.409393      | 846.409301       | -0.109      |
| c23    | 2+     | 1269.110452     | 1269.110459      | 0.006       |
| c24    | 2+     | 1297.621184     | 1297.620988      | -0.151      |
| c26    | 3+     | 926.790274      | 926.790027       | -0.267      |
| c26    | 2+     | 1890.183152     | 1890.183166      | 0.007       |
| c27    | 3+     | 964.484962      | 964.484299       | -0.687      |
| c27    | 2+     | 1446.725192     | 1446.726334      | 0.789       |
| c30    | 3+     | 1056.188874     | 1056.188926      | 0.049       |
| c30    | 2+     | 1584.782465     | 1584.781451      | -0.640      |
| c32    | 3+     | 1127.560247     | 1127.560294      | 0.042       |
| M+c35  | 4+     | 1886.161825     | 1886.160904      | -0.488      |
| M+c36  | 4+     | 1911.675709     | 1911.674109      | -0.837      |
| 2M+c30 | 5+     | 2195.464155     | 2195.464715      | 0.255       |
| 2M+c34 | 5+     | 2267.699988     | 2267.699908      | -0.035      |
| 2M+c35 | 7+     | 1635.791881     | 1635.791842      | -0.024      |
| 2M+c35 | 6+     | 1908.423016     | 1908.422376      | -0.335      |
| 2M+c35 | 5+     | 2289.906164     | 2289.907005      | 0.367       |
| 2M+c36 | 7+     | 1650.370440     | 1650.369669      | -0.467      |
| 2M+c36 | 6+     | 1925.264301     | 1925.264063      | -0.124      |
| 2M+c36 | 5+     | 2310.318271     | 2310.317485      | -0.340      |
| M+z23  | 3+     | 2106.687071     | 2106.687266      | 0.093       |

| Ion                     | Charge | Theoretical m/z | Experimental m/z | Error (ppm) |
|-------------------------|--------|-----------------|------------------|-------------|
| 2M+z5                   | 4+     | 2083.497355     | 2083.498318      | 0.462       |
| 2M+z6                   | 4+     | 2108.012511     | 2108.012947      | 0.207       |
| 2M+z7                   | 5+     | 1709.019096     | 1709.019944      | 0.496       |
| 2M+z7                   | 4+     | 2137.526829     | 2137.527322      | 0.231       |
| 2M+z10                  | 5+     | 1764.642859     | 1764.643131      | 0.154       |
| 2M+z10                  | 4+     | 2205.802305     | 2205.802133      | -0.078      |
| 2M+z11                  | 5+     | 1787.059229     | 1787.060986      | 0.983       |
| 2M+z11                  | 4+     | 2235.076894     | 2235.077545      | 0.291       |
| 2M+z12                  | 4+     | 2262.344371     | 2262.343377      | -0.439      |
| 2M+z13                  | 5+     | 1824.083932     | 1824.083442      | -0.269      |
| 2M+z13                  | 4+     | 2280.355611     | 2280.355687      | 0.033       |
| 2M+z14                  | 5+     | 1835.287772     | 1835.287996      | 0.122       |
| 2M+z14                  | 4+     | 2294.610979     | 2294.609671      | -0.570      |
| 2M+z15                  | 5+     | 1864.500986     | 1864.500270      | -0.384      |
| 2M+z16                  | 5+     | 1887.510052     | 1887.510169      | 0.062       |
| 2M+z16                  | 4+     | 2359.888843     | 2359.889136      | 0.124       |
| 2M+z17                  | 5+     | 1910.719554     | 1910.719165      | -0.204      |
| 2M+z17                  | 4+     | 2388.650128     | 2388.649501      | -0.262      |
| 2M+z18                  | 5+     | 1927.925508     | 1927.924985      | -0.271      |
| 2M+z18                  | 4+     | 2409.405841     | 2409.405482      | -0.149      |
| 2M+z19                  | 4+     | 2431.915600     | 2431.916230      | 0.259       |
| 2M+z20                  | 5+     | 1972.944156     | 1972.943782      | -0.190      |
| 2M+z20                  | 4+     | 2466.181719     | 2466.182499      | 0.316       |
| 2M+z21                  | 5+     | 1992.557390     | 1992.557247      | -0.072      |
| 2M+z22                  | 5+     | 2015.374671     | 2015.374524      | -0.073      |
| 2M+z22                  | 4+     | 2519.971551     | 2519.971167      | -0.152      |
| 2M+z23                  | 6+     | 1703.824077     | 1703.823394      | -0.401      |
| 2M+z23                  | 5+     | 2044.587908     | 2044.587680      | -0.112      |
| 2M+z23                  | 4+     | 2555.736390     | 2555.735772      | -0.242      |
| 2M+z24                  | 6+     | 1722.998291     | 1722.997816      | -0.276      |
| 2M+z24                  | 5+     | 2067.598059     | 2067.598981      | 0.446       |
| 2M+z24                  | 4+     | 2584.496336     | 2584.495916      | -0.163      |
| 2M+z26                  | 6+     | 1753.685163     | 1753.686125      | 0.549       |
| 2M+z26                  | 5+     | 2104.622773     | 2104.623063      | 0.138       |
| 2M+z26                  | 4+     | 2630.777217     | 2630.776164      | -0.400      |
| 2M+z27                  | 6+     | 1779.367869     | 1779.367588      | -0.158      |
| 2M+z27                  | 5+     | 2135.842994     | 2135.842285      | -0.332      |
| 2M+z27                  | 4+     | 2669.803880     | 2669.802875      | -0.376      |
| 2M+z28                  | 6+     | 1801.212170     | 1801.210973      | -0.665      |
| 2M+z28                  | 5+     | 2161.254244     | 2161.254600      | 0.165       |
| 2M+z30                  | 6+     | 1829.558849     | 1829.559634      | 0.429       |
| 2M+z30                  | 4+     | 2745.842000     | 2745.843566      | 0.570       |
| 2M+z34                  | 6+     | 1892.414312     | 1892.414141      | -0.090      |
| 2M+z34                  | 5+     | 2270.496380     | 2270.495936      | -0.196      |
| 2M+z34                  | 4+     | 2838.121979     | 2838.121431      | -0.193      |
| 2M+z36                  | 5+     | 2314.508068     | 2314.506366      | -0.735      |
| Average Error:          |        |                 |                  | -0.067      |
| Absolute Average Error: |        |                 |                  | 0.280       |
| Standard Deviation:     |        |                 |                  | 0.343       |

**Table S5.** List of the assigned fragments from the ECD mass spectrum of the 8+ charge state hIAPP

trimer ion (in aqueous solution with 2% residual DMSO). M represents one hIAPP unit.

The table of assigned ECD MS/MS fragments of the 5+ hIAPP dimer  
(in aqueous solution only)

| Ion                     | Charge | Theoretical $m/z$ | Experimental $m/z$ | Error (ppm) |
|-------------------------|--------|-------------------|--------------------|-------------|
| [MI]                    | 3+     | 1302.297541       | 1302.297961        | 0.323       |
| 2[MI]                   | 5+     | 1561.553258       | 1561.552850        | -0.261      |
| 2[MI]                   | 4+     | 1952.693410       | 1952.695277        | 0.956       |
| 2[MI]                   | 3+     | 2603.927471       | 2603.928753        | 0.492       |
| 2[MI]                   | 2+     | 3906.890716       | 3906.890042        | -0.173      |
| 4[MI]                   | 9+     | 1735.727472       | 1735.727516        | 0.025       |
| 4[MI]                   | 7+     | 2231.792930       | 2231.793086        | 0.070       |
| c10                     | 1+     | 1037.450279       | 1037.450277        | -0.002      |
| M+c34                   | 3+     | 2477.204233       | 2477.204139        | -0.038      |
| M+c35                   | 4+     | 1886.413773       | 1886.413868        | 0.050       |
| M+c35                   | 3+     | 2515.552587       | 2515.553103        | 0.205       |
| M+c36                   | 4+     | 1912.176753       | 1912.176749        | -0.002      |
| M+c36                   | 3+     | 2549.237059       | 2549.237578        | 0.204       |
| M+z27                   | 3+     | 2257.442353       | 2257.441339        | -0.449      |
| M+z34                   | 3+     | 2482.868892       | 2482.868192        | -0.282      |
| M+z36                   | 4+     | 1916.665083       | 1916.666074        | 0.517       |
| Average Error:          |        |                   |                    | 0.102       |
| Absolute Average Error: |        |                   |                    | 0.253       |
| Standard Deviation:     |        |                   |                    | 0.350       |

**Table S6.** List of the assigned ECD MS/MS fragments of the 5+ charge state hIAPP dimer (in aqueous solution only). M represents one hIAPP unit.

The table of assigned ECD MS/MS fragments of the 7+ hIAPP dimer  
(in aqueous solution only)

| Ion                     | Charge | Theoretical m/z | Experimental m/z | Error (ppm) |
|-------------------------|--------|-----------------|------------------|-------------|
| [M]                     | 3+     | 1301.295128     | 1301.295155      | 0.021       |
| [M]                     | 2+     | 1951.439053     | 1951.439594      | 0.277       |
| 2[M]                    | 7+     | 1116.112578     | 1116.112111      | -0.418      |
| 2[M]                    | 6+     | 1302.131432     | 1302.130613      | -0.629      |
| 2[M]                    | 5+     | 1562.557828     | 1562.556711      | -0.715      |
| 2[M]                    | 4+     | 1953.197422     | 1953.197083      | -0.174      |
| 2[M]                    | 3+     | 2604.597466     | 2604.599266      | 0.691       |
| a17                     | 2+     | 904.468923      | 904.469305       | 0.422       |
| c3                      | 1+     | 362.173076      | 362.173079       | 0.008       |
| c5                      | 1+     | 534.257869      | 534.257718       | -0.283      |
| c6                      | 1+     | 635.305548      | 635.305497       | -0.080      |
| c7                      | 1+     | 737.306908      | 737.306894       | -0.019      |
| c8                      | 1+     | 808.344022      | 808.343993       | -0.036      |
| c9                      | 1+     | 909.391701      | 909.391626       | -0.082      |
| c10                     | 2+     | 519.228778      | 519.228684       | -0.181      |
| c10                     | 1+     | 1037.450279     | 1037.450421      | 0.137       |
| c11                     | 2+     | 597.279333      | 597.279269       | -0.107      |
| c11                     | 1+     | 1193.551390     | 1193.552256      | 0.726       |
| c12                     | 2+     | 653.821365      | 653.821253       | -0.171      |
| c13                     | 2+     | 689.339922      | 689.339879       | -0.062      |
| c13                     | 1+     | 1377.672568     | 1377.672392      | -0.128      |
| c14                     | 2+     | 746.361386      | 746.361366       | -0.027      |
| c14                     | 1+     | 1491.715496     | 1491.715364      | -0.088      |
| c15                     | 2+     | 819.895593      | 819.895629       | 0.044       |
| c16                     | 2+     | 876.437625      | 876.437799       | 0.199       |
| c17                     | 2+     | 925.971832      | 925.971871       | 0.042       |
| c18                     | 2+     | 994.501288      | 994.501399       | 0.112       |
| c19                     | 2+     | 1038.017303     | 1038.017367      | 0.062       |
| c20                     | 2+     | 1081.533317     | 1081.533380      | 0.058       |
| c21                     | 3+     | 759.372279      | 759.372332       | 0.070       |
| c21                     | 2+     | 1138.554781     | 1138.554898      | 0.103       |
| c22                     | 3+     | 797.386589      | 797.386535       | -0.068      |
| c22                     | 2+     | 1195.576245     | 1195.576726      | 0.402       |
| c23                     | 3+     | 846.409393      | 846.409348       | -0.053      |
| c23                     | 2+     | 1269.110452     | 1269.110661      | 0.165       |
| c24                     | 3+     | 865.416548      | 865.416434       | -0.132      |
| c25                     | 3+     | 889.095586      | 889.095288       | -0.335      |
| c26                     | 3+     | 926.790274      | 926.790073       | -0.217      |
| c26                     | 2+     | 1389.681773     | 1389.681581      | -0.138      |
| c27                     | 3+     | 964.484962      | 964.484562       | -0.415      |
| c27                     | 2+     | 1446.223805     | 1446.224334      | 0.366       |
| c28                     | 3+     | 993.495638      | 993.495502       | -0.137      |
| c28                     | 2+     | 1490.241206     | 1490.242028      | 0.552       |
| c29                     | 3+     | 1023.174607     | 1023.174961      | 0.346       |
| c29                     | 2+     | 1534.759192     | 1534.760089      | 0.584       |
| c30                     | 3+     | 1056.188874     | 1056.188728      | -0.138      |
| c30                     | 2+     | 1584.281062     | 1584.281747      | 0.432       |
| c31                     | 3+     | 1094.203184     | 1094.203292      | 0.099       |
| c31                     | 2+     | 1641.305046     | 1641.305402      | 0.217       |
| c32                     | 3+     | 1127.225988     | 1127.225585      | -0.358      |
| c32                     | 2+     | 1691.841749     | 1691.841673      | -0.045      |
| c33                     | 2+     | 1146.567401     | 1146.568161      | 0.663       |
| c33                     | 2+     | 1719.347463     | 1719.347416      | -0.027      |
| c34                     | 2+     | 1175.578077     | 1175.578159      | 0.070       |
| c34                     | 2+     | 1762.362091     | 1762.362565      | 0.269       |
| c35                     | 3+     | 1213.926469     | 1213.926076      | -0.324      |
| c35                     | 2+     | 1819.884937     | 1819.885330      | 0.216       |
| c36                     | 3+     | 1247.608904     | 1247.608555      | -0.280      |
| c36                     | 2+     | 1871.410938     | 1871.411570      | 0.338       |
| y3                      | 1+     | 396.187761      | 396.187739       | -0.056      |
| y4                      | 1+     | 483.219790      | 483.219859       | 0.143       |
| y5                      | 1+     | 540.241254      | 540.241149       | -0.194      |
| y6                      | 1+     | 639.309668      | 639.309731       | 0.099       |
| y7                      | 1+     | 753.352596      | 753.352333       | -0.349      |
| y8                      | 1+     | 854.400275      | 854.400411       | 0.159       |
| y9                      | 1+     | 941.432304      | 941.432472       | 0.178       |
| z2                      | 1+     | 266.126109      | 266.126109       | 0.000       |
| z3                      | 1+     | 381.176861      | 381.176838       | -0.060      |
| z5                      | 1+     | 525.230353      | 525.230286       | -0.128      |
| z27                     | 2+     | 1434.726804     | 1434.726864      | 0.042       |
| z28                     | 2+     | 1498.252176     | 1498.252684      | 0.339       |
| M+c28                   | 4+     | 1722.092874     | 1722.092573      | -0.175      |
| M+c31                   | 5+     | 1437.899490     | 1437.898369      | -0.780      |
| M+c32                   | 5+     | 1457.713182     | 1457.712567      | -0.422      |
| M+c32                   | 4+     | 1822.641179     | 1822.641257      | 0.043       |
| M+c33                   | 5+     | 1469.319041     | 1469.319187      | 0.099       |
| M+c33                   | 4+     | 1835.895847     | 1835.896338      | 0.267       |
| M+c34                   | 5+     | 1486.523886     | 1486.523255      | -0.424      |
| M+c34                   | 4+     | 1857.903038     | 1857.903286      | 0.133       |
| M+c34                   | 3+     | 2477.206107     | 2477.206784      | 0.273       |
| M+c35                   | 6+     | 1257.944941     | 1257.944384      | -0.443      |
| M+c35                   | 5+     | 1509.132031     | 1509.131650      | -0.252      |
| M+c35                   | 4+     | 1886.413773     | 1886.413722      | -0.027      |
| M+c35                   | 3+     | 2515.888529     | 2515.889693      | 0.463       |
| M+c36                   | 6+     | 1274.619189     | 1274.618504      | -0.537      |
| M+c36                   | 5+     | 1530.344824     | 1530.344143      | -0.445      |
| M+z3                    | 3+     | 1428.016652     | 1428.017814      | 0.814       |
| M+z4                    | 3+     | 1457.361471     | 1457.361442      | -0.020      |
| M+z5                    | 3+     | 1476.370423     | 1476.369607      | -0.553      |
| M+z5                    | 2+     | 2214.553213     | 2214.553546      | 0.150       |
| M+z6                    | 3+     | 1510.061465     | 1510.061814      | 0.231       |
| M+z7                    | 3+     | 1547.741690     | 1547.741300      | -0.252      |
| M+z7                    | 2+     | 2321.108897     | 2321.107527      | -0.590      |
| M+z8                    | 3+     | 1581.758350     | 1581.758113      | -0.150      |
| M+z9                    | 3+     | 1610.434934     | 1610.434541      | -0.244      |
| M+z10                   | 4+     | 1230.085200     | 1230.085218      | 0.015       |
| M+z10                   | 3+     | 1639.445612     | 1639.445189      | -0.258      |
| M+z11                   | 3+     | 1676.471807     | 1676.471280      | -0.350      |
| M+z12                   | 3+     | 1714.835007     | 1714.834779      | -0.133      |
| M+z13                   | 3+     | 1738.514047     | 1738.513671      | -0.216      |
| M+z13                   | 2+     | 2607.267432     | 2607.267132      | -0.115      |
| M+z14                   | 4+     | 1318.391358     | 1318.390730      | -0.476      |
| M+z14                   | 3+     | 1757.855327     | 1757.854802      | -0.299      |
| M+z14                   | 2+     | 2636.279353     | 2636.279372      | 0.007       |
| M+z15                   | 4+     | 1355.158481     | 1355.158135      | -0.255      |
| M+z15                   | 3+     | 1806.878157     | 1806.877692      | -0.257      |
| M+z16                   | 4+     | 1383.669106     | 1383.669214      | 0.078       |
| M+z16                   | 3+     | 1844.892468     | 1844.892459      | -0.005      |
| M+z16                   | 2+     | 2767.338976     | 2767.339318      | 0.124       |
| M+z17                   | 4+     | 1412.179946     | 1412.179831      | -0.081      |
| M+z17                   | 3+     | 1882.906778     | 1882.907494      | 0.380       |
| M+z17                   | 2+     | 2824.861593     | 2824.862515      | 0.326       |
| M+z18                   | 4+     | 1433.937956     | 1433.938030      | 0.052       |
| M+z18                   | 3+     | 1911.917458     | 1911.917980      | 0.273       |
| M+z19                   | 4+     | 1455.695966     | 1455.695755      | -0.145      |
| M+z19                   | 2+     | 2910.888569     | 2910.887702      | -0.298      |
| M+z20                   | 4+     | 1489.960695     | 1489.961248      | 0.371       |
| M+z20                   | 3+     | 1986.280293     | 1986.280702      | 0.206       |
| M+z21                   | 4+     | 1514.727806     | 1514.727172      | -0.419      |
| M+z21                   | 3+     | 2019.971374     | 2019.972282      | 0.450       |
| M+z22                   | 4+     | 1542.998831     | 1542.998568      | -0.170      |
| M+z22                   | 3+     | 2057.331957     | 2057.332668      | 0.346       |
| M+z23                   | 5+     | 1264.214693     | 1264.214468      | -0.178      |
| M+z23                   | 4+     | 1579.765949     | 1579.765670      | -0.177      |
| M+z23                   | 3+     | 2105.352124     | 2105.352029      | -0.045      |
| M+z23                   | 2+     | 3160.033644     | 3160.033403      | -0.076      |
| M+z24                   | 4+     | 1608.276681     | 1608.276576      | -0.065      |
| M+z24                   | 3+     | 2144.034920     | 2144.034716      | -0.095      |
| M+z25                   | 4+     | 1626.035962     | 1626.035200      | -0.469      |
| M+z25                   | 3+     | 2168.382264     | 2168.382341      | 0.036       |
| M+z26                   | 5+     | 1323.847526     | 1323.846832      | -0.524      |
| M+z26                   | 4+     | 1654.306958     | 1654.306403      | -0.335      |
| M+z26                   | 3+     | 2206.078772     | 2206.078781      | 0.004       |
| M+z27                   | 5+     | 1354.666757     | 1354.666205      | -0.407      |
| M+z27                   | 4+     | 1693.584213     | 1693.583638      | -0.340      |
| M+z27                   | 3+     | 2258.112467     | 2258.112424      | -0.019      |
| M+z28                   | 5+     | 1380.679464     | 1380.679001      | -0.335      |
| M+z28                   | 4+     | 1726.100055     | 1726.099418      | -0.369      |
| M+z29                   | 5+     | 1400.889004     | 1400.888206      | -0.570      |
| M+z29                   | 4+     | 1750.860782     | 1750.860731      | -0.029      |
| M+z30                   | 5+     | 1414.895940     | 1414.895086      | -0.604      |
| M+z30                   | 4+     | 1768.620062     | 1768.620698      | 0.360       |
| M+z30                   | 3+     | 2357.824324     | 2357.824847      | 0.222       |
| M+z33                   | 4+     | 1837.893258     | 1837.892451      | -0.439      |
| M+z34                   | 5+     | 1490.123150     | 1490.122540      | -0.409      |
| M+z34                   | 4+     | 1862.654075     | 1862.654369      | 0.158       |
| M+z34                   | 3+     | 2483.204833     | 2483.203905      | -0.374      |
| M+z35                   | 5+     | 1512.931737     | 1512.932144      | 0.269       |
| M+z35                   | 4+     | 1891.164808     | 1891.165443      | 0.336       |
| M+z36                   | 5+     | 1533.331957     | 1533.330732      | -0.799      |
| M+z36                   | 4+     | 1916.915620     | 1916.916114      | 0.258       |
| Average Error:          |        |                 |                  | -0.044      |
| Absolute Average Error: |        |                 |                  | 0.248       |
| Standard Deviation:     |        |                 |                  | 0.311       |

**Table S7.** List of the assigned ECD MS/MS fragments of the 7+ charge state hIAPP dimer (in aqueous solution only). M represents one hIAPP unit.

The table of assigned ECD MS/MS fragments of the 8+ hIAPP trimer  
(in aqueous solution only)

| Ion                     | Charge | Theoretical $m/z$ | Experimental $m/z$ | Error (ppm) |
|-------------------------|--------|-------------------|--------------------|-------------|
| [M]                     | 3+     | 1301.295128       | 1301.295525        | 0.305       |
| [M]                     | 2+     | 1951.940453       | 1951.941533        | 0.553       |
| 2[M]                    | 5+     | 1562.356263       | 1562.356241        | -0.014      |
| 2[M]                    | 4+     | 1952.693510       | 1952.693825        | 0.161       |
| 2[M]                    | 3+     | 2603.591528       | 2603.591786        | 0.099       |
| 3[M]                    | 8+     | 1464.582971       | 1464.582582        | -0.266      |
| 3[M]                    | 7+     | 1673.952355       | 1673.951942        | -0.247      |
| 3[M]                    | 6+     | 1952.944506       | 1952.944697        | 0.098       |
| 3[M]                    | 5+     | 2343.533517       | 2343.534255        | 0.315       |
| 3[M]                    | 4+     | 2929.417034       | 2929.416863        | -0.058      |
| c3                      | 1+     | 363.180901        | 363.180901         | 0.000       |
| c7                      | 1+     | 737.306908        | 737.306979         | 0.096       |
| c9                      | 1+     | 909.391701        | 909.391753         | 0.057       |
| c10                     | 1+     | 1037.450279       | 1037.450632        | 0.340       |
| c13                     | 2+     | 689.339922        | 689.339981         | 0.086       |
| c13                     | 1+     | 1377.672568       | 1377.672453        | -0.083      |
| c14                     | 2+     | 746.361386        | 746.361488         | 0.137       |
| c14                     | 1+     | 1491.715496       | 1491.716356        | 0.577       |
| c15                     | 2+     | 819.895593        | 819.895671         | 0.095       |
| c15                     | 1+     | 1638.783910       | 1638.784787        | 0.535       |
| c18                     | 2+     | 994.501288        | 994.501941         | 0.657       |
| c19                     | 2+     | 1038.017303       | 1038.017693        | 0.376       |
| c20                     | 2+     | 1081.533317       | 1081.533296        | -0.019      |
| c21                     | 2+     | 1138.554781       | 1138.554888        | 0.094       |
| c23                     | 2+     | 1269.110452       | 1269.110367        | -0.067      |
| c30                     | 3+     | 1056.857180       | 1056.857694        | 0.486       |
| M+c14                   | 4+     | 1349.651986       | 1349.652295        | 0.229       |
| M+z23                   | 3+     | 2105.685906       | 2105.684670        | -0.587      |
| 2M+c34                  | 5+     | 2267.699988       | 2267.699294        | -0.306      |
| 2M+c35                  | 7+     | 1635.791881       | 1635.790912        | -0.592      |
| 2M+c35                  | 6+     | 1908.423016       | 1908.423197        | 0.095       |
| 2M+c35                  | 5+     | 2290.106592       | 2290.106669        | 0.034       |
| 2M+c36                  | 7+     | 1650.370440       | 1650.369713        | -0.441      |
| 2M+c36                  | 6+     | 1925.264301       | 1925.265117        | 0.424       |
| 2M+c36                  | 5+     | 2310.517700       | 2310.518213        | 0.222       |
| 2M+z7                   | 4+     | 2136.773804       | 2136.773786        | -0.008      |
| 2M+z11                  | 4+     | 2234.575828       | 2234.573911        | -0.858      |
| 2M+z13                  | 4+     | 2280.103655       | 2280.102968        | -0.301      |
| 2M+z14                  | 5+     | 1835.287772       | 1835.287864        | 0.050       |
| 2M+z14                  | 4+     | 2294.109849       | 2294.110242        | 0.171       |
| 2M+z16                  | 5+     | 1887.510052       | 1887.510259        | 0.110       |
| 2M+z16                  | 4+     | 2359.387700       | 2359.387809        | 0.046       |
| 2M+z17                  | 5+     | 1910.719554       | 1910.718763        | -0.414      |
| 2M+z17                  | 4+     | 1388.149011       | 1388.149681        | 0.483       |
| 2M+z18                  | 5+     | 1927.925508       | 1927.924537        | -0.504      |
| 2M+z18                  | 4+     | 2410.157588       | 2410.156797        | -0.328      |
| 2M+z19                  | 4+     | 2431.414510       | 2431.414302        | -0.086      |
| 2M+z20                  | 5+     | 1972.944156       | 1972.943100        | -0.535      |
| 2M+z22                  | 5+     | 2015.374671       | 2015.375993        | 0.656       |
| 2M+z22                  | 4+     | 2519.469038       | 2519.470008        | 0.385       |
| 2M+z23                  | 6+     | 1703.824077       | 1703.824082        | 0.003       |
| 2M+z23                  | 5+     | 2044.587908       | 2044.588728        | 0.401       |
| 2M+z23                  | 4+     | 2556.488124       | 2556.488923        | 0.313       |
| 2M+z24                  | 6+     | 1722.998291       | 1722.999253        | 0.558       |
| 2M+z24                  | 5+     | 2067.598059       | 2067.597329        | -0.353      |
| 2M+z24                  | 4+     | 2583.995165       | 2583.994963        | -0.078      |
| 2M+z26                  | 5+     | 2104.822114       | 2104.821212        | -0.429      |
| 2M+z27                  | 6+     | 1779.367869       | 1779.367687        | -0.102      |
| 2M+z27                  | 5+     | 2135.842994       | 2135.842633        | -0.169      |
| 2M+z27                  | 4+     | 2670.556970       | 2670.556856        | -0.043      |
| 2M+z28                  | 5+     | 2161.453606       | 2161.454306        | 0.324       |
| 2M+z30                  | 6+     | 1829.558849       | 1829.558150        | -0.382      |
| 2M+z34                  | 6+     | 1892.414312       | 1892.413093        | -0.644      |
| 2M+z34                  | 5+     | 2271.499727       | 2271.499425        | -0.133      |
| Average Error:          |        |                   |                    | 0.024       |
| Absolute Average Error: |        |                   |                    | 0.275       |
| Standard Deviation:     |        |                   |                    | 0.348       |

**Table S8.** List of the assigned fragments from the ECD mass spectrum of the 8+ charge state

hIAPP trimer ion (in aqueous solution only). M represents one hIAPP unit.

| Ion                     | Charge | Theoretical $m/z$ | Experimental $m/z$ | Error (ppm) |
|-------------------------|--------|-------------------|--------------------|-------------|
| 2MH+c5                  | 1+     | 2182.024503       | 2182.024212        | -0.133      |
| 2MH+c6                  | 1+     | 2297.075256       | 2297.074902        | -0.154      |
| 2MH+c7                  | 1+     | 2399.126351       | 2399.124459        | -0.789      |
| 2MH+z5                  | 1+     | 2232.011932       | 2232.011937        | 0.002       |
| 2MH+z6                  | 1+     | 2330.076933       | 2330.074927        | -0.861      |
| 2MH+z7                  | 1+     | 2444.119860       | 2444.119499        | -0.148      |
| 5MH+c6                  | 3+     | 1620.088832       | 1620.088636        | -0.121      |
| 5MH+c7                  | 3+     | 1654.441566       | 1654.442594        | 0.621       |
| 5MH+z7                  | 3+     | 1669.439658       | 1669.439893        | 0.141       |
| 3[MH]                   | 2+     | 1281.096770       | 1281.096595        | -0.137      |
| 3[MH]                   | 1+     | 2561.185513       | 2561.186263        | 0.293       |
| 6[MH]                   | 4+     | 1282.350153       | 1282.349911        | -0.189      |
| 6[MH]                   | 3+     | 1708.797730       | 1708.798167        | 0.256       |
| MH                      | 1+     | 854.400272        | 854.400285         | 0.015       |
| Average Error:          |        |                   |                    | -0.086      |
| Absolute Average Error: |        |                   |                    | 0.276       |
| Standard Deviation:     |        |                   |                    | 0.387       |

**Table S9.** List of the assigned fragments from the ECD mass spectrum of the 2+ charge state

trimer of the hIAPP segment ( $^{30}\text{TNVGSNTY}^{37}\text{-NH}_2$ ). M represents one hIAPP unit.

| Ion                     | Charge | Theoretical <i>m/z</i> | Experimental <i>m/z</i> | Error (ppm) |
|-------------------------|--------|------------------------|-------------------------|-------------|
| [hIAPP]                 | 3+     | 1301.295034            | 1301.295128             | 0.072       |
| [hIAPP]                 | 2+     | 1952.946261            | 1952.945652             | -0.312      |
| [hIAPP+TNVGSNTY]        | 4+     | 1189.571414            | 1189.571482             | 0.057       |
| [hIAPP+TNVGSNTY]        | 3+     | 1586.095401            | 1586.095367             | -0.021      |
| [hIAPP+TNVGSNTY]        | 2+     | 2379.645083            | 2379.644330             | -0.316      |
| [TNVGSNTY]              | 1+     | 854.400272             | 854.400332              | 0.070       |
| c3                      | 1+     | 363.180901             | 363.180902              | 0.003       |
| c7                      | 1+     | 737.306908             | 737.306884              | -0.033      |
| c9                      | 1+     | 909.391701             | 909.392057              | 0.391       |
| c10                     | 1+     | 1037.450279            | 1037.450525             | 0.237       |
| c35                     | 2+     | 1820.386836            | 1820.386597             | -0.131      |
| c ion of TNVGS          | 1+     | 476.246339             | 476.246325              | -0.029      |
| c ion of TNVGSN         | 1+     | 590.289267             | 590.289294              | 0.046       |
| c ion of TNVGSNT        | 1+     | 691.336946             | 691.336919              | -0.039      |
| hIAPP+z ion of SNTY     | 2+     | 2185.541566            | 2185.540981             | -0.268      |
| hIAPP+z ion of GSNTY    | 3+     | 1476.370423            | 1476.369560             | -0.585      |
| hIAPP+z ion of GSNTY    | 2+     | 2214.553924            | 2214.552379             | -0.698      |
| hIAPP+z ion of VGSNTY   | 3+     | 1509.057288            | 1509.057173             | -0.076      |
| hIAPP+z ion of VGSNTY   | 2+     | 2263.586505            | 2263.586224             | -0.124      |
| TNVGSNTY+c32            | 2+     | 2118.536699            | 2118.536594             | -0.050      |
| TNVGSNTY+c33            | 2+     | 2147.049813            | 2147.050779             | 0.450       |
| TNVGSNTY+c34            | 3+     | 1459.708148            | 1459.707114             | -0.708      |
| TNVGSNTY+c34            | 2+     | 2190.561113            | 2190.561344             | 0.105       |
| TNVGSNTY+c35            | 3+     | 1497.386516            | 1497.386130             | -0.258      |
| TNVGSNTY+c35            | 2+     | 2246.581754            | 2246.581291             | -0.206      |
| TNVGSNTY+c36            | 3+     | 1531.405017            | 1531.405418             | 0.262       |
| TNVGSNTY+c36            | 2+     | 2298.111132            | 2298.111262             | 0.057       |
| TNVGSNTY+z27            | 2+     | 1861.421286            | 1861.421295             | 0.005       |
| TNVGSNTY+z30            | 2+     | 2011.492975            | 2011.493855             | 0.437       |
| TNVGSNTY+z34            | 2+     | 2198.056564            | 2198.055447             | -0.508      |
| Average Error:          |        |                        |                         | -0.072      |
| Absolute Average Error: |        |                        |                         | 0.219       |
| Standard Deviation:     |        |                        |                         | 0.297       |

**Table S10.** List of the assigned fragments from the ECD mass spectrum of the 4+ charge state of

[hIAPP + <sup>30</sup>TNVGSNTY<sup>37</sup>-NH<sub>2</sub>] species.
